# Supplementary material for: Cox4i2 Triggers an Increase in Reactive Oxygen Species, Leading to Ferroptosis and Apoptosis in HHV7 Infected Schwann Cells
Source: Front Mol Biosci. 2021 May 7;8:660072. doi: 10.3389/fmolb.2021.660072 (PMC8138133; doi:10.3389/fmolb.2021.660072)
Supplement: Supplementary file 14 [file Table_1.DOCX]

Table 1. Primer sequences

| Genes | Sequences |
| --- | --- |
| Cox4i2 | Primer F 5' ACGGCTCTGGTGATTTGGTG 3' |
|  | Primer R 5' CCCTGTATGGGGTTGCTCTTC 3' |
| Map2k6 | Primer F 5' CGAAAGGCAAGAAGCGAAAC 3' |
|  | Primer R 5' CGCATCTTCTCCACCACCC 3' |
| Csf1r | Primer F 5' GGGCAGACCAGTCTCACGC 3' |
|  | Primer R 5' GCAGCCTCCCCTCGAATC 3' |
| FTH1 | Primer F 5' CGCCAGAACTACCACCAGG 3' |
|  | Primer R 5' TCAGGGCCACATCATCCC 3' |
| TFRC | Primer F 5' ACACCCGGTTTAGCCTTGC 3' |
|  | Primer R 5' TGACTTGTCCGCCTCTTCC 3' |
| IREB2 | Primer F 5' AGCCGACCTGCTCTTCCC 3' |
|  | Primer R 5' CCAGCCACGCCTACTTGC3' |
| SLC7A11 | Primer F 5' CATCATCGGCACCGTCATC 3' |
|  | Primer R 5' CCAGCAGTTCCACCCAGAC 3' |
| SLC3A2 | Primer F 5' GCCGTGGTTATCATCGTTCG 3' |
|  | Primer R 5' TCTCGCTTCCGGGCCTAC 3' |
| GPX4 | Primer F 5' CAGTTCGGGAGGCAGGAG 3' |
|  | Primer R 5' GGACTTTCATCCATTTCCACAG 3' |
| Caspase 3 | Primer F 5' TGGAACGAACGGACCTGTG 3' |
|  | Primer R 5' CGGGTGCGGTAGAGTAAGC 3' |
| GAPDH | Primer F 5' GGAGTCTACTGGCGTCTTCAC 3' |
|  | Primer R 5' ATGAGCCCTTCCACGATGC 3' |
